# Supplementary material for: Nanoparticle-delivered siRNA targeting Bruton's tyrosine kinase for rheumatoid arthritis therapy
Source: Royal Society of Chemistry journal article supplement (doi:10.1039/c9bm01025d), 2019-01-01
Supplement: c9bm01025d1.pdf [file c9bm01025d1.pdf]

## Nanoparticle-Delivered siRNA Targeting Bruton's Tyrosine Kinase for Rheumatoid Arthritis Therapy

Gui Zhao<sup>Ψ, 1</sup>, An Liu<sup>Ψ, 1</sup>, Yue Zhang<sup>Π</sup>, Zu-Qi Zuo<sup>Ψ</sup>, Zhi-Ting Cao<sup>Π, Σ</sup>, Hou-Bing Zhang<sup>Ψ</sup>, Cong-Fei Xu<sup>Π, †, \*</sup>, Jun Wang<sup>Π, Ω, †, \*</sup>

<sup>Ψ</sup> School of Life Sciences, University of Science and Technology of China, Hefei 230027, P. R. China

<sup>Π</sup> Institutes for Life Sciences, School of Biomedical Sciences and Engineering, Guangzhou International Campus, South China University of Technology, Guangzhou 510006, P. R. China

<sup>Σ</sup> National Engineering Research Center for Tissue Restoration and Reconstruction, South China University of Technology, Guangzhou 510006, P. R. China

<sup>†</sup> Key Laboratory of Biomedical Materials and Engineering of the Ministry of Education, South China University of Technology, Guangzhou 510006, P. R. China

<sup>Ω</sup> Key Laboratory of Biomedical Engineering of Guangdong Province, and Innovation Center for Tissue Restoration and Reconstruction, South China University of Technology, Guangzhou 510006, P. R. China

<sup>‡</sup> Guangzhou Regenerative Medicine and Health Guangdong Laboratory, Guangzhou 510005, P. R. China

<sup>1</sup> These authors contribute equally to this work

### \*Corresponding Authors:

[xucf@scut.edu.cn](mailto:xucf@scut.edu.cn) (Cong-Fei Xu)

[mcjwang@scut.edu.cn](mailto:mcjwang@scut.edu.cn) (Jun Wang)

**Keywords:** siRNA; Nanoparticle; Autoimmunity; Bruton's Tyrosine Kinase; Rheumatoid Arthritis

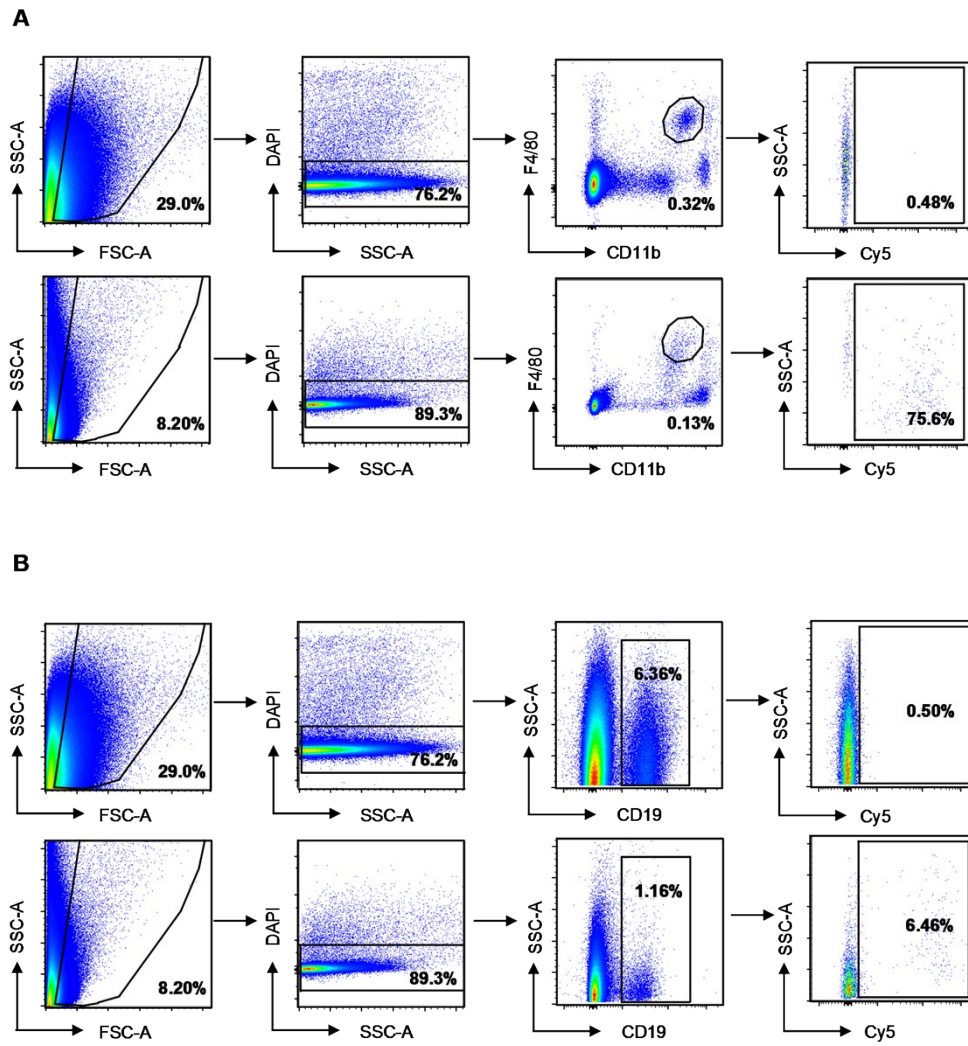

Fig. S1. Gating strategy of the flow cytometric analysis in blood. (A) Gating strategy of CD11b<sup>+</sup>F4/80<sup>+</sup> macrophages in blood. (B) Gating strategy of CD19<sup>+</sup> B cells in blood.

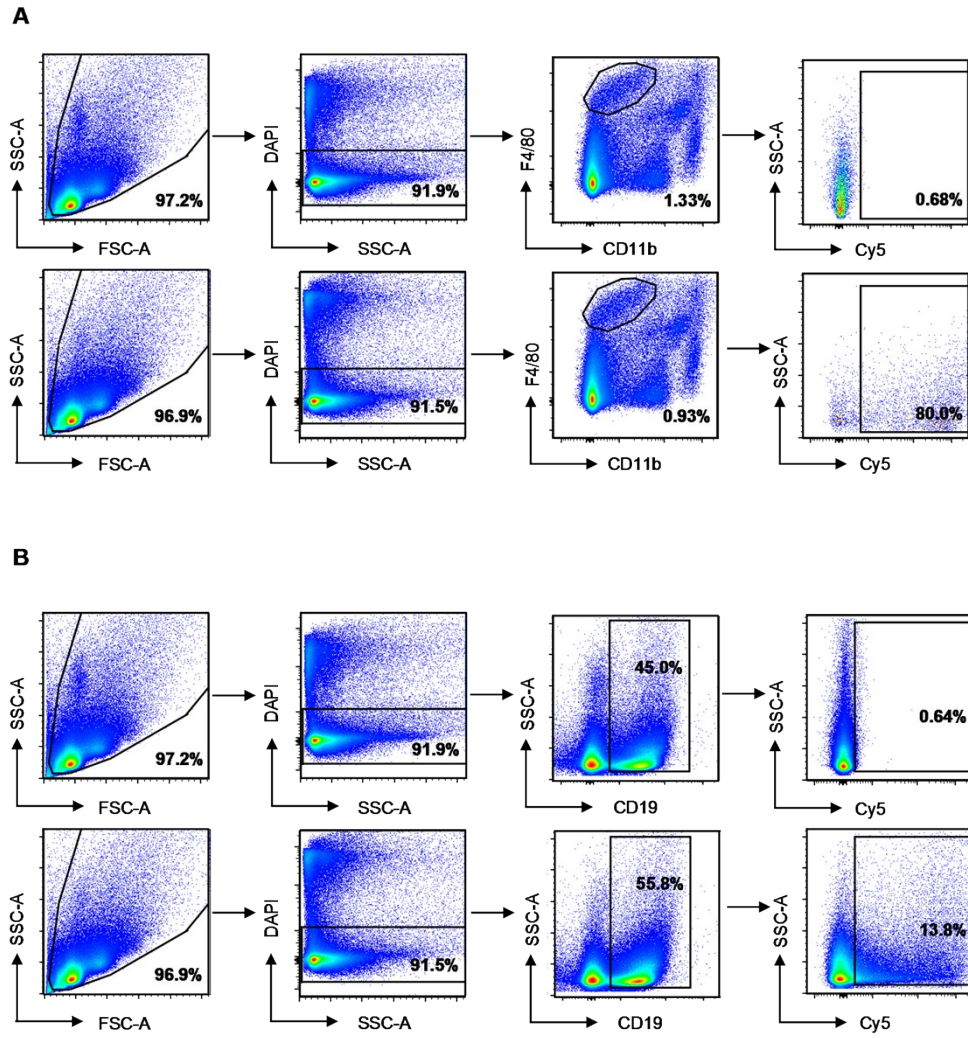

Fig. S2. Gating strategy of the flow cytometric analysis in spleen. (A) Gating strategy of CD11b<sup>+</sup>F4/80<sup>+</sup> macrophages in spleen. (B) Gating strategy of CD19<sup>+</sup> B cells in spleen.

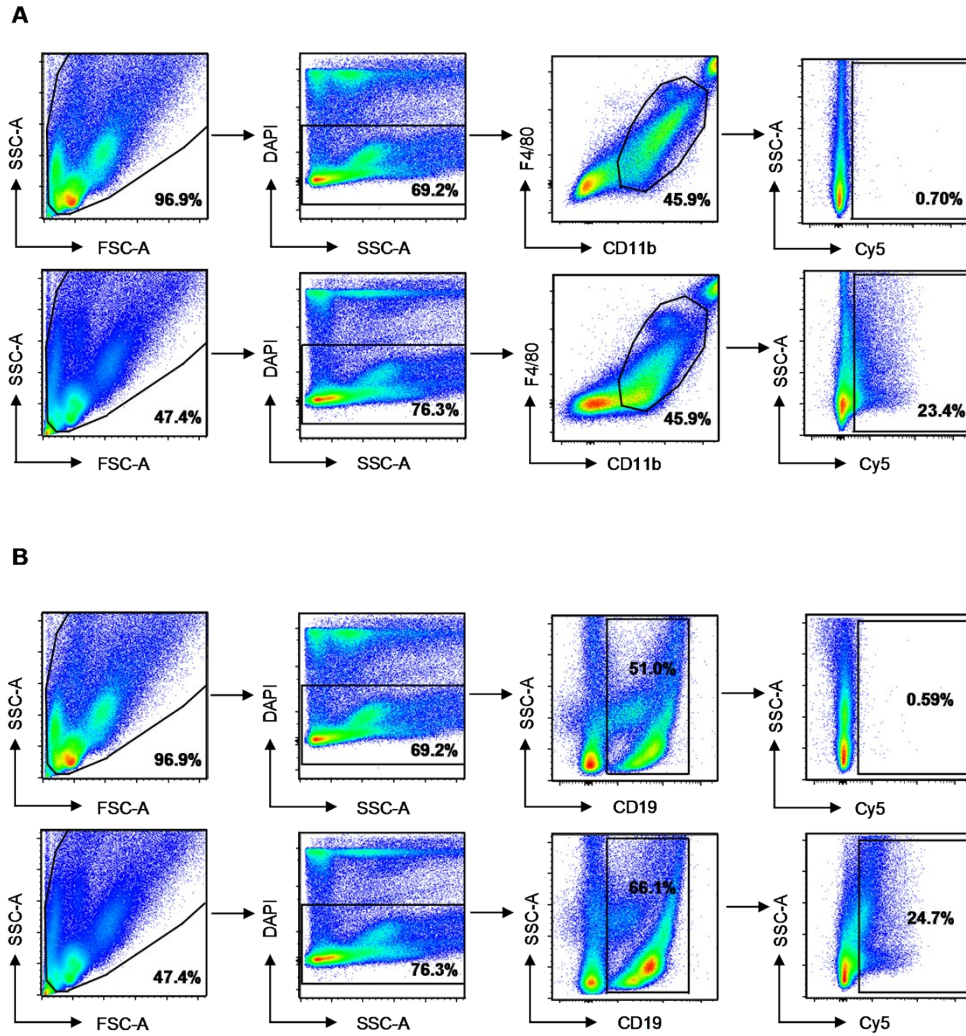

Fig. S3. Gating strategy of the flow cytometric analysis in PC exudate. (A) Gating strategy of CD11b<sup>+</sup>F4/80<sup>+</sup> macrophages in PC exudate. (B) Gating strategy of CD19<sup>+</sup> B cells in PC exudate.

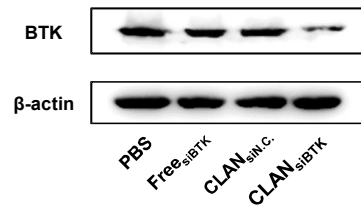

Fig. S4. The knockdown efficiency of CLAN<sub>siBTK</sub> on the protein expression of BTK in B cells *in vivo*. Spleen B cells were isolated after three times injection of CLAN<sub>siBTK</sub> and measured by Western blotting.

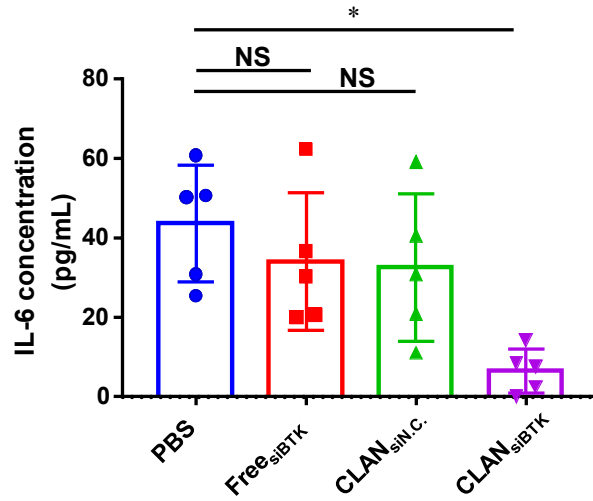

Fig. S5. CLAN<sub>siBTK</sub> treatment reduced serum IL-6 in CIA mice. After treatment, serum IL-6 was measured by enzyme-linked immunosorbent assay (ELISA). Data are shown as the means  $\pm$  SD (n = 5). \*  $P < 0.05$ .
